1 ***Title***

2 **The dual role of the angiosperm radiation on insect diversification**

3

4 ***Authors***

5 David Peris<sup>a\*</sup> and Fabien L. Condamine<sup>b</sup>

6

7 ***Affiliations***

8 <sup>a</sup>Institut Botànic de Barcelona (CSIC-Ajuntament de Barcelona), 08038 Barcelona, Spain.

9 <sup>b</sup>CNRS, UMR 5554 Institut des Sciences de l'Evolution de Montpellier, Université de  
10 Montpellier, Place Eugène Bataillon, 34095 Montpellier, France.

11 \* Corresponding author DP (daperce@gmail.com)

12

13

14 **Abstract**

15 Most of the animal pollination is realized by insects, interactions between them and flowering  
16 plants have been hypothesized to be important drivers of diversification. Yet, there is weak  
17 support for coevolutionary diversification in plant–pollinator interactions. Macroevolutionary  
18 studies on insect and plant diversities support the hypothesis that angiosperms evolved after an  
19 insect diversity peak in the Early Cretaceous, suggesting that gymnosperm pollinators may have  
20 been accessible for angiosperms when they evolved. We examined fossil and phylogenetic  
21 evidence documenting this hypothesis and provide new clues on the impact of angiosperm  
22 radiation on insect diversification. Using the family-level fossil record of insects and a Bayesian  
23 process-based approach, we estimated diversification rates and the role of six different variables  
24 on insect macroevolutionary history. We found that, among the six tested variables, angiosperms  
25 had a dual role that has changed through time with an attenuation of insect extinction in the  
26 Cretaceous and a driver of insect origination in the Cenozoic. However, increasing insect  
27 diversity, spore plants and global temperature also showed strong positive correlation with both  
28 origination and extinction rates of insects, suggesting that different drivers had important effect  
29 on insect evolution, not just angiosperms, which would deserve further studies.

30

## 31 **Introduction**

32 Pollination is an essential activity in the sexual reproduction of many plants, particularly for plants  
33 producing seeds. The difficulty of active movement in most plants makes necessary the action of  
34 different pollination agents to transport their male gametes contained within pollen to ovule  
35 bearing, female structures of the same species. These transport agents can be wind, water, or  
36 vertebrate animals, although most plants require principally the action of invertebrate animals for  
37 their reproduction (Ollerton, 2017). Most current pollinators belong to one of the four major insect  
38 orders: Hymenoptera, Diptera, Lepidoptera and Coleoptera (Ollerton, 2017). Iconic pollinator  
39 groups currently include bees and butterflies. However, a variety of seed plants existed and  
40 possessed reproductive organs long before the evolution of these more notable pollinator groups.  
41 This suggests that ancient plants were pollinated by a different spectrum of pollinator agents  
42 (Labandeira, 2007; Peris et al., 2017; Khramov et al., 2020).

43 Gymnosperms dominated the land surface until their sister clade, the angiosperms,  
44 experienced a rapid diversification in the Cretaceous, for some authors called the Angiosperm  
45 Radiation (125–90 Ma, *e.g.*, Labandeira, 2014), the Cretaceous Terrestrial Revolution (125–80  
46 Ma, Lloyd et al., 2008), but recently also known as the Angiosperm Terrestrial Revolution (ATR,  
47 100–50 Ma, Benton et al., 2022) (Figure 1). This turnover likely caused a decline of conifers  
48 (Condamine et al., 2020) and other plant lineages (Lidgard and Crane, 1988). First plants were  
49 wind pollinated until some insects diversified and started to feed on gymnosperm ovular  
50 secretions in a surface-fluid-feeding way or gymnosperm pollen (Labandeira 1998), predating  
51 that of nectar-feeding insects on angiosperms (Nepi et al., 2017) (Figure 1).

52 The complex interactions between pollinators and gymnosperms seems to have been  
53 persisting since, at least, the early Permian (283–273 million years ago, Ma), predating the first  
54 flowering plants by more than 100 Ma (Khramov et al., 2022). There is a diverse well-documented  
55 herbivore community from the Cretaceous found in sediments and ambers supporting  
56 gymnosperm–insect pollination modes and host associations with ginkogaleans, cycads, conifers  
57 and bennettitalean gymnosperms during the Early and the beginning of the Late Cretaceous  
58 (Labandeira, 2007; Peris et al., 2017, 2020; Khramov et al., 2020) (Figure 1). By contrast,  
59 evidence for angiosperm-pollen consumers or flower visitors appeared only in the Late  
60 Cretaceous, around 99 Ma (Peris et al., 2020; Peña-Kaitath et al., in prep.). It is thought that  
61 flowering plants have interacted with pollinating insects since their beginning (Grimaldi, 1999;  
62 Labandeira, 2007), but gymnosperm-adapted insects were not using extensively angiosperms  
63 resources yet until the Late Cretaceous (Labandeira, 2007; Peris et al., 2017; 2020). Elucidating  
64 when, how and why the ecological transformation of ecosystems began with the coevolution  
65 between insects and flowering plants has become an idea of recent interest (van der Kooi and  
66 Ollerton, 2020; Benton et al., 2022; Asar et al., 2022).

67

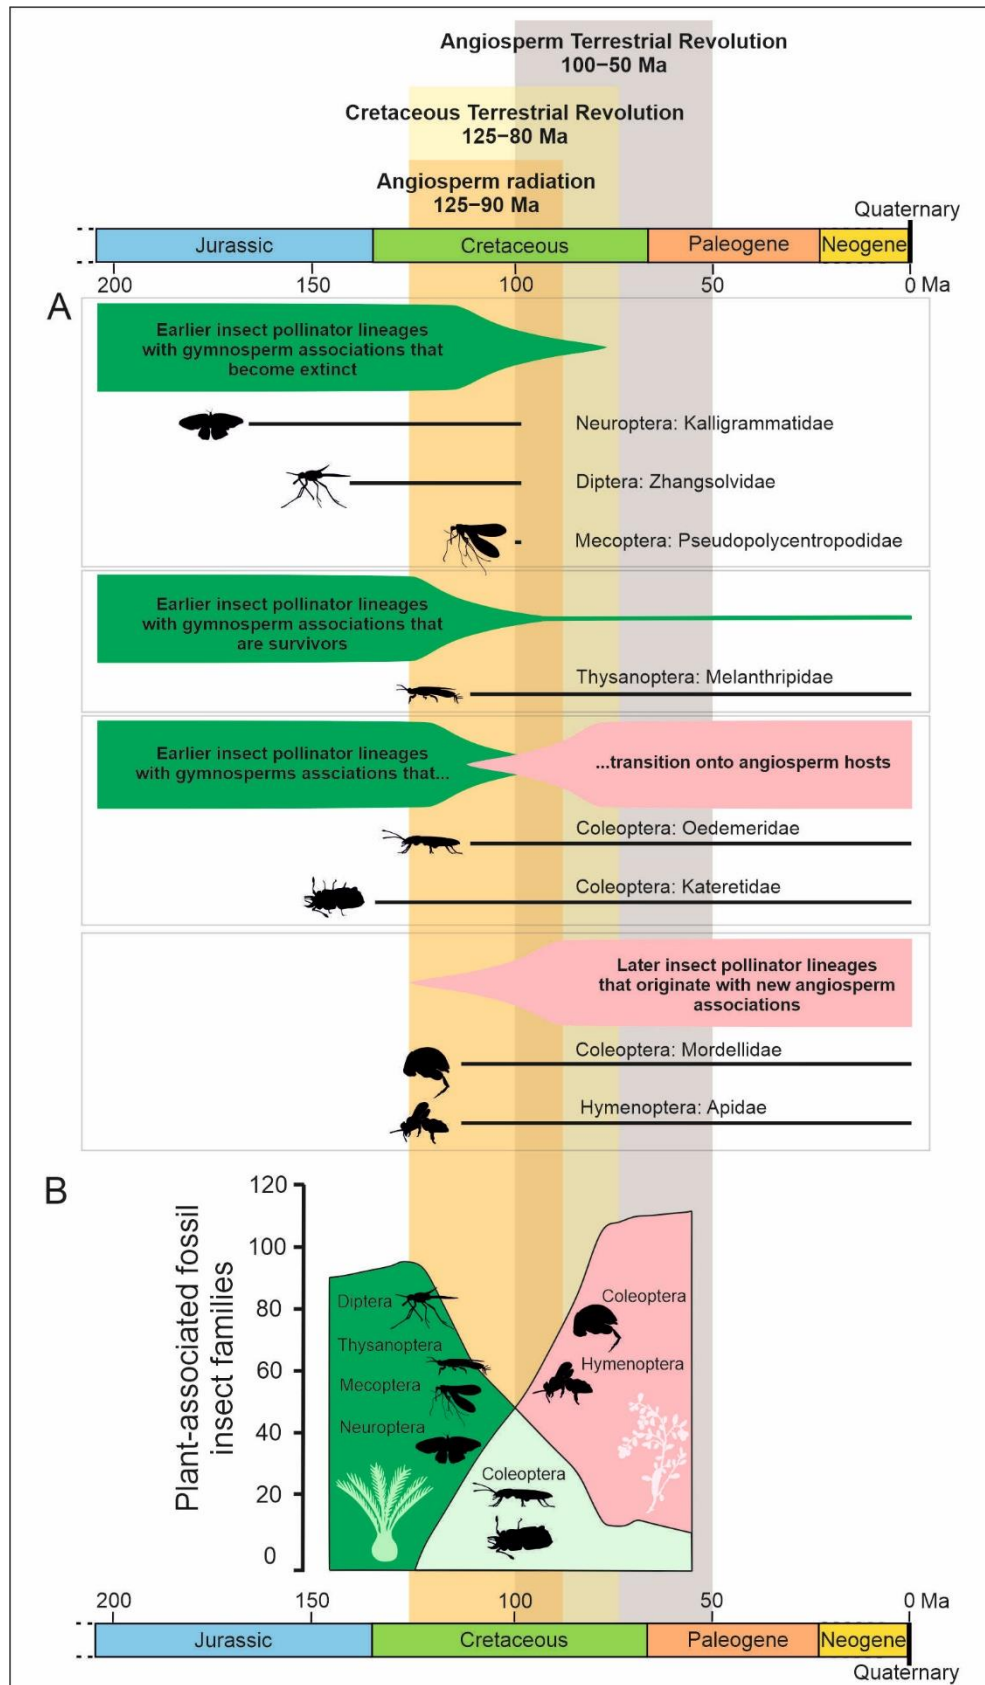

68

69 **Figure 1.** Different Cretaceous pollination modes described in Peris et al. (2017), showing different groups of insects  
 70 under distinctive patterns of extinction, survival, and origination following the gymnosperm-angiosperm transition.  
 71 The fossil pollination cases reviewed in Peris et al. (2020) and Peña-Kaitath et al. (in prep.). The period of angiosperm  
 72 evolution is marked as Angiosperm Radiation (Labandeira, 2014), Cretaceous Terrestrial Revolution (Lloyd et al.,

73 2008), and Angiosperm Terrestrial Revolution (Benton et al., 2022). **A.** Diverse fossil community of Cretaceous  
74 pollinators and the lifespan of these families. **B.** Representation of the transition from gymnosperm–insect pollination  
75 to angiosperm–insect pollination with the transitional examples.

76

77 The great radiation of modern insect lineages started 245 Ma (Labandeira and Sepkoski,  
78 1993; Rainford et al. 2014). Since the Jurassic, insect families showed low extinction rates  
79 (Labandeira and Sepkoski, 1993; Jarzembowski and Ross, 1996; Condamine et al. 2016). Insect  
80 family-richness peaked during the Early Cretaceous around 125 Ma, when angiosperms were still  
81 rare (Claphman et al., 2016; Schachat et al., 2019). This peak occurred prior to extinctions within  
82 early-diverging groups, in part linked to mid-Cretaceous floral turnover following the evolution  
83 of flowering plants (Claphman et al., 2016; Condamine et al., 2020) (Figure 2). The Early  
84 Cretaceous richness peak may therefore reflect a transitional period in insect evolution where  
85 radiating extant families coexisted with early-diverging ones that are rare today or that became  
86 extinct (Peris et al., 2014; 2020b; Nel et al., 2015; Claphman et al., 2016). The overlap between  
87 insects that had specialized relationships with gymnosperms and insects that had specialized  
88 relationships with angiosperms may have also contributed to the Early Cretaceous peak in insect  
89 diversity (Peris et al., 2017; 2020b; Schachat et al., 2019).

90

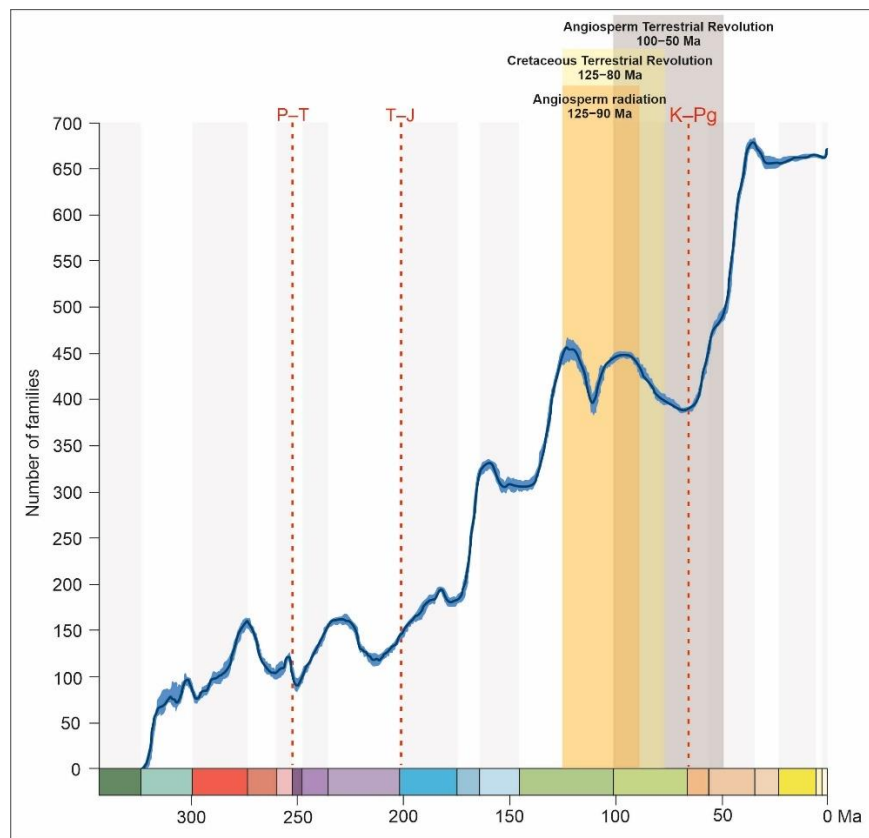

91

92 **Figure 2.** Insect family accumulation through time using the software PyRate and the family-level fossil dataset of  
93 Condamine et al. (2016). Red dot lines indicate the Permian–Triassic (P–T), Triassic–Jurassic (T–J), and the  
94 Cretaceous–Paleogene (K–Pg) mass extinction. The period of angiosperm evolution is marked as Angiosperm

95 Radiation (Labandeira, 2014), Cretaceous Terrestrial Revolution (Lloyd et al., 2008), and Angiosperm Terrestrial  
96 Revolution (Benton et al., 2022).

97

98 Here we reviewed the evidence on the origin of flowering plants and their related  
99 pollinator insect lineages, and we tested the impact of angiosperm radiation on insect  
100 diversification. We analysed the role that six different variables (diversity dependence,  
101 angiosperms, gymnosperms, spore plants, continental fragmentation, and temperature) have on  
102 diversification rates of insects (Figure 3).

103

104

### 105 **Evolution of angiosperms**

106 Today angiosperms dominate most terrestrial ecosystems and provide an important part of the  
107 food chain and niche requirements for many other organisms. Estimations indicate that flowering  
108 plants represent about 90% of all land plants (embryophytes), which is around 300,000 living  
109 species (Christenhusz and Byng, 2016). The present-day diversity of species and forms in  
110 flowering plants have intrigued biologists for more than 150 years (Buggs, 2021). Their origin  
111 was one of the most transformative events in Earth history (Figures 1–2). However, the age of  
112 crown angiosperms remains highly uncertain (Sauquet et al., 2022), despite recent claims of more  
113 definite answer to when exactly angiosperms originated and began to diversify (*e.g.*, Barba-  
114 Montoya et al., 2018; Li et al., 2019; Silvestro et al., 2021). The stem age of angiosperms, their  
115 divergence time from extant gymnosperms, is dated as 310–380 Ma depending on the study  
116 (Clarke et al., 2011; Magallón et al., 2013, Silvestro et al., 2015, Nie et al., 2020). By contrast,  
117 the morphological age of flowering plants, that is the age when they are morphology identifiable  
118 in the fossil record, is not yet well understood, variously dated from 250–140 Ma (Sauquet and  
119 Magallón, 2018).

120 The earliest fossil remains that can be assigned with high confidence to crown-group  
121 angiosperms are tricolpate pollen grains from the Barremian–Aptian transition (121 Ma, Hughes,  
122 1994), which states the morphological age of angiosperms. Oldest pollen exhibiting subsets of  
123 definitive crown-angiosperm characters is known as far back as the Middle Triassic (237–247  
124 Ma), but these are difficult to discriminate from pollen produced by stem-angiosperms or  
125 gymnosperms (Doyle and Hotton, 1991; Coiro et al., 2019). Slightly younger Aptian floral  
126 assemblages was followed by an explosive increase in diversity in the middle and Late Cretaceous  
127 (Lidgard and Crane, 1988; Friis et al., 2011). The fossil record provides fundamental evidence on  
128 the timescale and pattern of the origin and early evolution of angiosperms (Coiro et al., 2019).  
129 This is what some authors interpreted as an explosive radiation from a Cretaceous crown-ancestor  
130 (Benton et al., 2022). By contrast, there is a nearly universal molecular support for a pre-  
131 Cretaceous origin of crown angiosperms (Barba-Montoya et al., 2018).

132 Differences between molecular results and fossil record when estimating the age of crown  
133 angiosperms are not in conflict according to Sauquet et al. (2022), because both approaches rely  
134 ultimately on data from the fossil record since molecular dating studies are fossil-calibrated, albeit  
135 with different assumptions. Discrepancies between molecular clock and purely fossil-based  
136 interpretations of angiosperm diversification may be explained by two possible causes. One  
137 explanation suggests a long, cryptic evolutionary history of a non-ecologically significant group  
138 of early angiosperms (Doyle, 2012). They probably lived in environments in which fossilization  
139 was unlikely, resulting in an unrepresented fossil record. This idea is based on the early existence  
140 of triaperturate grain, known in the eudicots, which originated much later than the angiosperm-  
141 crown ancestor (Clarke et al., 2011). But this pollen character is also converging in  
142 Schizandraceae (Friis and Pedersen, 1996). It means that the record of the stem-group and original  
143 crown-group of angiosperms is still undiscovered, or at least unidentified. However, the  
144 synchronous diversification of fossil pollen, mesofossils and macrofossils through the Early  
145 Cretaceous would be difficult to explain if angiosperms had diversified cryptically for a  
146 significant time interval (Herendeen et al., 2017). It seems unlikely that crown groups emerge and  
147 keep an extensive period of hidden diversification. Instead, once they emerge, crown groups are  
148 probed to diversify rapidly and should quickly enter the fossil record (Budd and Mann, 2020).  
149 Thus, although early crown-group angiosperms may well have originated in the Jurassic (Coiro  
150 et al., 2019), the radiation of core angiosperms may have begun in the Cretaceous (Budd et al.,  
151 2021). An alternative explanation may be that molecular clock estimates are inaccurate with a  
152 trend to overestimation (Barba-Montoya et al., 2018). Indeed, molecular dating methods are not  
153 free from potential sources of bias (Beaulieu et al., 2015; Bromham et al., 2018; Budd et al., 2021;  
154 Sauquet et al., 2022). However, it is technically possible to reconcile prior assumptions drawn  
155 from the fossil record with fossil-calibrated molecular dating approaches, since fossil-calibrated  
156 molecular dating analyses can be designed based on such prior assumptions of what crown  
157 angiosperm age is (Budd et al., 2021; Sauquet et al., 2022).

158 The discussion is taking part while putative crown-angiosperm fossils from the Jurassic  
159 of China (*e.g.*, Fu et al., 2018) have been consistently rejected (Herendeen et al., 2017; Bateman,  
160 2020; Sokoloff et al., 2020). All these supposed crown groups of angiosperms described from  
161 pre-Cretaceous time either represent other plant groups or lack features that might confidently  
162 assign them to the angiosperms (Coiro et al., 2019). It is therefore likely that some seed plants  
163 along the angiosperm stem-lineage from the Triassic and Jurassic possessed some, but not all, of  
164 the features of crown group angiosperms. So far, however, the discrepancy remains, due to the  
165 lack of undisputed pre-Cretaceous crown-angiosperm fossils (Herendeen et al., 2017).

166 Despite the uncertainty in the timing of the origin of crown-angiosperms, it seems clear  
167 that the diversification of the major lineages of angiosperms occurred during the Late Cretaceous  
168 (Magallón et al., 2015; Barba-Montoya et al., 2018; Li et al., 2019; Budd et al., 2021). From that

169 time, the fossil record reflects flowering plants to have risen to ecological dominance in terrestrial  
170 communities up to the Paleogene (Silvestro et al., 2015; Ramírez-Barahona et al., 2020), along  
171 with the origin of hyperdiverse biomes such as tropical rainforests (Carvalho et al., 2021). This  
172 time does appear to coincide with a peak in the diversity of insects, including herbivores and  
173 pollinators and their predators (Claphman et al., 2016; Schachat et al., 2019), corroborating the  
174 hypothesis of the ATR — an explosive boost to terrestrial diversity occurred from 100–50 Ma,  
175 the Late Cretaceous and early Palaeogene (Benton et al., 2022).

176

### 177 **Evolution of pollinators**

178 Assuming that a pollinator is an organism that moves pollen from the male anther to the female  
179 stigma in flowers is simplistic. This statement faces two main problems. On one hand, insect  
180 pollination (entomophily) is a process that occurs especially but not exclusively on flowering  
181 plants. While around 85% of flowering plants are biotically pollinated (Ollerton et al., 2011),  
182 around 40% of gymnosperms (including Cycadales and Gnetales) are also pollinated by insects  
183 (Ickert-Bond and Renner, 2016; Toon et al., 2020). However, pollination requirements of most  
184 gymnosperms and most wild plants are surprisingly unknown. On the other hand, if the definition  
185 of a pollinator implies an active process, it would be difficult to find evidence of such a behaviour  
186 from the fossil record, and when and how the pollination process evolved. The characters that a  
187 fossil must meet to be considered a pollinator is still an open discussion (Peris et al., 2020; Peña-  
188 Kairath et al., in prep.).

189 Organisms involved in the pollination process include iconic groups of Recent  
190 pollinators, namely bees (Hymenoptera), long-proboscis butterflies (Lepidoptera), or many  
191 different groups of beetles and flies (Coleoptera and Diptera, respectively). However, although  
192 less significant in present times, some families in Thysanoptera, Hemiptera, Neuroptera,  
193 Orthoptera and Blattodea have been proved to be pollinators of some plant groups (Ollerton et  
194 al., 2017; Peña-Kairath et al., in prep.) (Figure 4). Within the extant insect orders, different extinct  
195 groups in Neuroptera, Mecoptera and Diptera display long mouthparts and rostra adapted to  
196 feeding on pollination drops of extinct gymnosperms and floral nectar (Khramov et al., 2020,  
197 2022). It is interesting to note that all ancient representatives with long mouthparts are currently  
198 extinct in Mecoptera and Neuroptera, and that Mecoptera, unlike Neuroptera, do not include  
199 specialized-pollen feeders today. This indicates that any relationship with pollination in  
200 Mecoptera corresponds to an ancestral behaviour. Finally, two fossil groups of insects have also  
201 been cited as presumable pollinators in deep times (Peña-Kairath et al., in prep.): Permopsocida,  
202 an insect order known from the early Permian but extinct during the mid-Cretaceous, for which  
203 angiosperm pollen has been found in the intestines and in contact with the abdomen of a taxon  
204 (Huang et al., 2016); and Alienoptera, an extinct group with described species since the Early  
205 Cretaceous to the Eocene, for which a Cretaceous nymph has been described in contact with

206 gymnosperm pollen clumps (Luo et al., 2022). Fossils from the extant order Grylloblattodea and  
207 the extinct orders Miomoptera and Hypoperlida have been described from early Permian  
208 sediments, more than 270 Ma, with pollen grains in their guts (references in Peña-Kairath et al.,  
209 in prep.), which suggests these organisms were likely consuming pollen at that time. However,  
210 their pollination habit in these last cases is more dubious (Peña-Kairath et al., in prep.).

211 The fossil record together with phylogenetic studies show a scenario in which all the  
212 extant and extinct orders of insects that include pollinators evolved well before the Early  
213 Cretaceous (Figure 4). They show an origin that largely predates the diversification of crown  
214 angiosperms, except for lineages of some flies, bees and long-proboscid butterflies  
215 (Supplementary Information).

216

### 217 **Angiosperms evolved in a time of insect diversity peak**

218 A growing number of fossil insect taxa have been described pollinating different groups of plants  
219 in the fossil record. All these fossil pollinators were described exclusively associated with  
220 gymnosperms until the beginning of the Late Cretaceous, when a combination of both  
221 gymnosperm and angiosperm hosts are found associated with the described fossils, but only  
222 evidence of angiosperm host remain in more recent cases (Peris et al., 2020; Peña-Kairath et al.,  
223 in prep.) (Figure 1). Entomophilous pollination is found to be common during the Cretaceous,  
224 which is consistent with the diversification of the major groups of angiosperms around 100 Ma  
225 (Barba-Montoya et al., 2018; Budd et al., 2021) and their rise to ecological dominance in  
226 terrestrial communities in the late Cenozoic (Condamine et al. 2020; Ramírez-Barahona et al.,  
227 2020).

228 Highly specialized pollination is evidenced in some groups of insects by the development  
229 of suctorial feeding structures such as long-proboscid nectar-feeding mouthparts (Khramov et al.,  
230 2020), described since the early Permian (Khramov et al., 2022). Such mouthparts are thought to  
231 be used for feeding on pollination drops released on the micropyles of the ovules concealed inside  
232 the gymnosperm strobili (Labandeira et al., 2007). It is not surprising that lineages with specific  
233 adaptations were extinct together with their gymnosperm host when angiosperms turnover ancient  
234 ecosystems, such as the long-proboscid Mecoptera, Neuroptera, and the zhangsolvid Diptera  
235 (Figure 1). Plant diversity declined by 45% at the K/Pg boundary (Silvestro et al., 2015;  
236 Condamine et al. 2020; Carvalho et al., 2021) probably exacerbated by pollinator specialization.  
237 By contrast, other groups represent generalist feeding habit, such as mandibulate beetles, that  
238 successfully transitioned from a gymnosperm- to angiosperm-dominated flora (Peris et al., 2017,  
239 2020). With the beginning of the Cenozoic the long-proboscid Mecoptera and Neuroptera were  
240 supplanted by Hymenoptera and Lepidoptera in the nectar-feeding niche (Khramov et al., 2020),  
241 but already on angiosperms. All these cases correspond to different pollination modes covered in  
242 Peris et al. (2017), showing different groups of insects under distinctive patterns of extinction,



243 survival, and origination following the gymnosperm-angiosperm transition (Figure 1). Wind  
244 pollination probably evolved in angiosperms from insect pollination in response to pollinator  
245 limitation and changes in the abiotic environment (Culley et al., 2002). Accordingly, insect  
246 pollination is still considered as the initial pollination mode for angiosperms (Hu et al., 2008).

247 Growing evidence from molecular dated phylogenetics, fossil record of pollinator insects,  
248 paleontological data on morphological features of plants and modelling of diversification  
249 dynamics support the hypothesis that angiosperms evolved in a time of insect diversity peak  
250 during the Early Cretaceous (Claphman et al., 2016; Schachat et al., 2019) (Figure 2). The  
251 essential trophic machinery of insects was in place nearly 100 million years before angiosperms  
252 appeared in the fossil record (Labandeira and Sepkoski, 1993). This high diversity represents a  
253 true burst of origination (Schachat et al., 2019), including insect lineages with highly adapted,  
254 pollination modes on gymnosperms (Peris et al., 2020; Khramov et al., 2020). That would mean  
255 that gymnosperm pollinators were available for angiosperms when they evolved, predating the  
256 first flowering plants (Labandeira, 2007; Peris et al., 2017, 2020; Khramov et al., 2020). However,  
257 assuming that the fossil record might be biased and incomplete, flowers might have arisen earlier  
258 according to molecular phylogenetics of plants. In addition, pollen and pollination-fluid-feeding  
259 have evolved independently across more than a dozen of insect orders, and in hundreds of families  
260 (Wardhaugh, 2015). Such an evolutionary convergence supports the hypothesis that it is relatively  
261 easy for pollinivory to evolve from feeding on the spores of fungi, ferns and other spore plants  
262 (Labandeira, 2000). The pre-Cretaceous diversity of insects that developed with non-angiosperm  
263 plants might have constituted a supertramp by which adaptations arose when angiosperms  
264 diversified and replaced gymnosperms by the end of the Cretaceous (Condamine et al. 2020).

265

### 266 **Role of the Angiosperm Revolution on the insect diversification**

267 The apparent temporal gap between insect pollinators and crown angiosperms seems to question  
268 the reciprocal diversification model, or coevolution between insects and flowering plants (Asar  
269 et al., 2022). Relying on qualitative comparisons has limits, and there are little quantitative tests  
270 to evaluate whether coevolution has spurred diversification between plants and insects. Here we  
271 retrieved the family-level fossil dataset of Condamine et al. (2016) to estimate whether origination  
272 and/or extinction rates varied through time and whether they could be correlated to the  
273 angiosperm radiation. We relied on the Bayesian framework implemented in PyRate (Silvestro et  
274 al., 2014, 2019) to simultaneously estimate correlations between diversification dynamics and  
275 multiple environmental variables (Lehtonen et al., 2017). We focus on the role of angiosperms  
276 but are aware that several drivers can have complementarily impacted the diversification of insects  
277 (see *Methods* for details). We thus incorporated six variables: the number of insect family through  
278 time (diversity dependence), the relative diversity of angiosperms, gymnosperms and spore plants

279 (Silvestro et al., 2015), the continental fragmentation (Zaffos et al., 2017), and the change in  
280 temperature (Prokoph et al., 2008).

281 First, we estimated origination and extinction rates across the whole evolutionary history  
282 of insects (*i.e.*, mid-Carboniferous to present), for which angiosperms were absent until the Early  
283 Cretaceous. Our modelling results shows that, among the six tested variables, angiosperms  
284 promoted a faster diversification of insects once they coevolved since the Cretaceous (Table 1a).  
285 This remarkable link between insect origination with angiosperm radiation was most probably the  
286 cause that drove the radiation of different groups of herbivores such as beetles (McKenna et al.,  
287 2009; Ahrens et al., 2014; Doorenweerd et al., 2017) and pollinators such as bees and long-  
288 proboscid butterflies since the mid-Cretaceous onwards (Cardinal and Danforth, 2013; Chazot et  
289 al., 2019). In addition, we found that the rise of flowering plants generally not only drove the  
290 origination of insect families, but they also buffer them against extinction (Table 1a). We then  
291 performed the same diversification analyses but with rates only estimated for the time interval  
292 covering the ATR (*sensu* Benton et al., 2022, from 100 to 50 Ma) and another set of analyses with  
293 rates only estimated in the aftermath of the ATR (from 50 Ma to present). The ATR-centred  
294 analyses indicated that the rise of angiosperms strongly decreased insect extinction rates during  
295 the ATR but did not affect insect origination rates (Table 1b, Figure 3). The post-ATR analyses  
296 indicated that the rise of angiosperms strongly increased insect origination rates and decreased  
297 insect extinction rates, but lesser than during the ATR (Table 1c, Figure 3). Therefore,  
298 angiosperms had a dual role that has changed through time with an attenuation of the extinction  
299 in the Cretaceous and beginning of the Cenozoic and a driver of origination in the Cenozoic, from  
300 50 Ma onwards.

301 It is also important to highlight, nevertheless, that the rise of angiosperms is not the only  
302 driver with significant identified effect on insect evolution (Table 1, Figure 3). The analyses also  
303 indicate that increasing insect diversity has slowed down origination rates in insects, which is line  
304 with the role of diversity dependence. Spore plants are also found as a strong positive correlation  
305 with both origination and extinction rates of insects, suggesting that higher spore plant diversity  
306 spurred insect turnover; a result that would deserve further studies given the important effect in  
307 our analyses (Table 1). Gymnosperms are never recovered as a significant driver in our analyses.  
308 We also unveil that global temperature correlates negatively with origination and positively with  
309 extinction, such that warmer climate led to lower origination and higher extinction in insects,  
310 which partly corroborates previous results for invertebrates (Mayhew et al., 2008). Different  
311 alternative hypotheses are also cited in the literature (*eg.* in Labandeira, 2014) but not covered in  
312 this analysis, which is focused eminently on the angiosperm-insect pollinators coevolution.

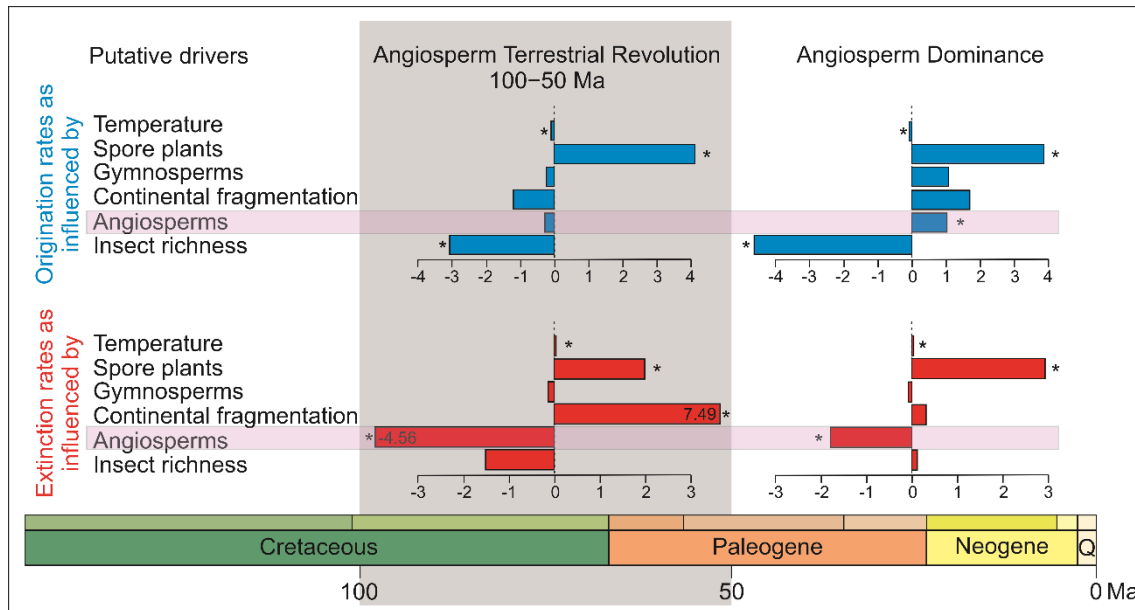

313

314

315

316

317

318

319

320

321

### 322 Triggers for the angiosperm success

323

324

325

326

327

328

329

330

331

332

333

334

335

336

337

338

339

**Figure 3.** Correlation trends of different analysed drivers for origination (in blue) and extinction (in red) rates on insect diversity for the Angiosperm Terrestrial Revolution timeframe (100–50 Ma, Benton et al., 2022) and for the Angiosperm Dominance period (50–0 Ma). Data used in this representation is offered in the Table 1. Drivers from top to bottom are Global mean temperature (Temperature), Spore plant relative diversity (Spore plants), Gymnosperm relative diversity (Gymnosperms), Continental fragmentation, Angiosperm relative diversity (Angiosperms), and Insect family richness (Insect richness). Asterisks indicate significant correlations recovered with the MBD model (shrinkage weight >0.5 and 95% CI not overlapping with zero).

The vast current diversity of angiosperms has been ascribed to different innovations in their reproductive, vegetative and genomic biology, which presumably played a central role in their diversification and rise to ecological dominance (Vamosi and Vamosi, 2011; Sauquet and Magallón, 2018; Vamosi et al., 2018; Benton et al., 2022). These attributes were considered to provide reproductive superiority over non-angiosperm seed plants, favouring their evolution after their origin (Soltis et al., 2019). Although diversification rate shifts are caused by changes in both speciation and extinction rates, it is not trivial to find the causes of rate shifts in such a biological radiation.

Many of the morphological features thought to represent key innovations in angiosperms may not be the only, or even the primary, cause of diversification rate shifts. The trait and ecological shifts driving higher rates of diversification have not generally been the synapomorphies used by systematists to define the major clades of angiosperms, such as flowers, double fertilization, endosperm development, and seeds encased in fruits (Vamosi et al., 2018). Instead, intrinsic key innovations, extrinsic factors such as geography and environment, or trait–environment combinations are important drivers of diversification rates (Vamosi and Vamosi, 2011; Chaboureau et al., 2014; Bouchenak-Khelladi et al., 2015; Lagomarsino et al., 2016; O’Meara et al., 2016; reviewed in Vamosi et al., 2018; Simonin and Roddy, 2018; Roddy et al.,

340 2020). Intrinsic key innovations include the whole-genome duplications event, named polyploidy,  
341 shared by all living angiosperms; the ability to reduce genome size, that enabled the reduction of  
342 the cell sizes; the herbaceousness, that is short generation time; maximizing photosynthetic  
343 efficiency by the increase of venation and stomatal density into their leaves since ~100 Ma (see  
344 references from above). Extrinsic factors can include patchy habitats, with habitat generalization  
345 leading to decreased extinction, open habitats favouring diversification of lineages adapted to  
346 such conditions, and island-like regions (including mountainous regions) increasing rates of  
347 allopatric speciation.

348 Close associations of flowering plants with pollinator insects are particularly supposed to  
349 have played an early role in angiosperm diversification (Crepet 1984; Grimaldi 1999; Hu et al.  
350 2008; Van der Niet et al., 2014). This co-diversification seemed to be the result from a pollinator  
351 transition of generalist pollen-feeding insects from gymnosperms to angiosperms (Labandeira et  
352 al., 2007; Peris et al., 2017, 2020). However, this hypothesis was called into question because the  
353 advantages offered by the gymnosperm pollinators did not prevent them from a decline (Crisp  
354 and Cook, 2011; Condamine et al., 2020; Gorelick, 2001; Khramov et al., 2020) and no plants  
355 other than angiosperms are diverse nowadays. Thus, it would be necessary to analyse the drivers  
356 of diversification in angiosperms (O'Meara et al., 2016) using a similar approach that we applied  
357 for insects here. While insect diversification was driven faster thanks to the coadaptation to  
358 angiosperms, our analysis shows that the gymnosperms are not recovered as a significant factor  
359 for the insect diversification (Table 1, Figure 3).

360 The rise of flowering plants through the Cretaceous, twice as productive as gymnosperms  
361 (Boyce and Lee, 2017), was followed by new systems of chemical defense, tolerance to climatic  
362 stress, and the (genetic) ability of certain angiosperm lineages to repeatedly evolve adaptive traits  
363 (Onstein, 2020). Those facts, together with climate changes, breakup of Pangea, increase of humid  
364 conditions during the Late Cretaceous (Chaboureau et al., 2014) and the global cooling at the end  
365 of the Paleogene, have been linked to the decline in conifer diversity from the Cretaceous (the  
366 last 110 Ma) and extended through the Cenozoic (Crisp and Cook, 2011; Condamine et al., 2020).  
367 The rise of angiosperms induced an active displacement by outcompeting conifers (Condamine  
368 et al., 2020), and caused conifers to have high extinction rates ever since (Crisp and Cook, 2011).  
369 Faced with this situation, gymnosperm pollinators likely had little options, adapt or go extinct  
370 depending on how specialized they were. The once diverse Cheirolepidiaceae and Bennettitales  
371 went extinct around the K/Pg boundary, as did some highly specialized long-proboscid flies,  
372 scorpionflies and lacewings related to these plants (Rothwell et al., 2009; Khramov et al., 2020).

373 Angiosperms did not achieve ecological dominance in a single step (Davies et al., 2004;  
374 Magallón and Castillo, 2009; Onstein, 2020). They were still low-biomass components of most  
375 Cretaceous floras (Carvalho et al., 2021). Rather, the appearance of various traits, the ability of  
376 certain angiosperm lineages to repeatedly evolve them, clade-specific radiations (Sauquet et al.,

377 2017; Onstein, 2020; Ramírez-Barahona et al., 2020), and their link with insect diversification  
378 likely spurred diversity in different groups following the K/Pg event (Carvalho et al., 2021). It  
379 was in the aftermath of the K/Pg event that the diversification of angiosperms and of insects had  
380 explosive impacts on each other through their species interactions (Asar et al., 2022), and only  
381 then angiosperms achieved ecological dominance (Carvalho et al., 2021). The diversity and  
382 dominance of crown-group angiosperm families and genera continued to rise in the Cenozoic,  
383 accelerating insect-angiosperm co-diversification (Allio et al., 2021), evolving multiple lineages  
384 of pollinating insects (Wiegmann et al., 2011; Sann et al., 2018; Chazot et al., 2019; Song et al.,  
385 2020; Cai et al., 2022), driving to the ‘modernization’ of Earth ecosystems.  
386

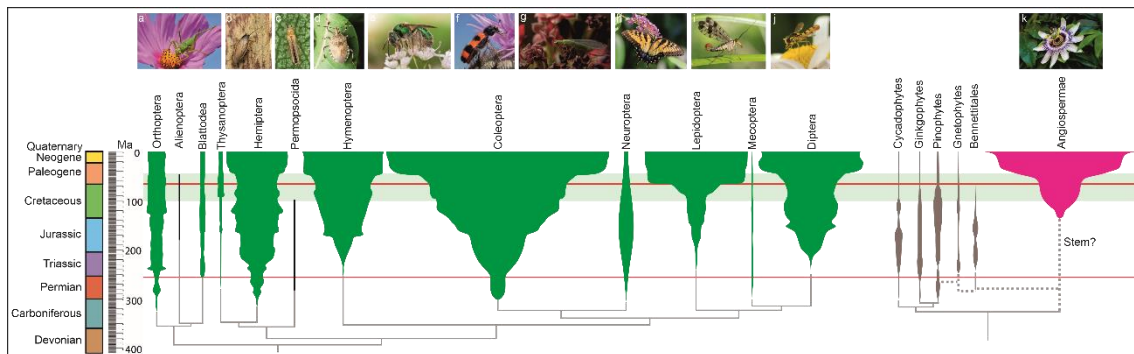

387  
388 **Figure 4.** Evolution of the insect orders with extant and/or extinct pollinator representatives, gymnosperms and  
389 angiosperms (flowering plants). Figure based on the “Tree of life” from the Museum of Natural History at the Oxford  
390 University, courtesy from Dr. Ricardo Pérez de la Fuente. Each of the lineages shown in the tree is scaled to the  
391 described number of extant species. Species’ recounts taken from the CoL (<https://www.catalogueoflife.org/>). Recent  
392 groups spindles of insects extracted from Labandeira and Eble (2000) and of plants from Benton et al. (2022). As  
393 Nicholson et al. (2015) showed, since 2000 the curve of insect diversity -based on families- through time has not  
394 substantially changed. Smaller lineages are namely represented as a line. Phylogenetic relationships of insects extracted  
395 from Misof et al. (2014), Beutel et al. (2017), and Giribet and Edgecombe (2019). Phylogenetic relationships of plants  
396 extracted from Novikov and Barabasz-Krasny (2015). Divergence times obtained using the TimeTree website  
397 <http://www.timetree.org/> except for the fossil insect orders Permopsocida (Huang et al., 2016) and Alienoptera (Luo et  
398 al., 2022). The origin of the Gnetophytes and the extinct Bennettitalean plants is controversial. The TimeTree website  
399 collates multiples papers dealing with divergence times and obtains an average. Red lines represent significant mass  
400 extinctions. Green zone represents the Angiosperm Terrestrial Revolution after Benton et al. (2022). Royalty-free  
401 images of insects and angiosperm on the top of the figure obtained from the website [www.freepick.es](http://www.freepick.es): a. Orthoptera;  
402 b. Blattodea; c. Thysanoptera; d. Hemiptera; e. Hymenoptera; f. Coleoptera; g. Neuroptera; h. Lepidoptera; i. Mecoptera;  
403 j. Diptera; k. Angiospermae.

404

#### 405 **Future considerations**

406 We still know little about the origins of entomophily and how it evolved, but theories regarding  
407 pollination-plant coevolution always predict an increased probability of radiation of both plants  
408 and the pollinating animals because of the mutualistic nature of the interaction (Gorelick, 2001).  
409 However, it does not always hold. Coevolutionary processes should not be considered the only

410 major drivers of diversification in plants and insects (Suchan and Alvarez, 2015), which is  
411 confirmed by our analyses indicating that global temperature, spore plants, and diversity  
412 dependence are additional drivers to study for explaining insect diversity. For instance, warmer  
413 global temperature drove higher origination and extinction in insects (Currano et al., 2016). Insect  
414 pollination is not a guarantee of higher success. For example, cycads are insect pollinated and  
415 have never been a diverse lineage (Condamine et al., 2015; Toon et al., 2020). By getting more  
416 specialized, it also increases the pollination efficiency, providing a mechanism to explain the  
417 boost in speciation rates (Citerne et al., 2010). However, specialization also increases the risk of  
418 extinction rate with environmental upheavals. Under fluctuating conditions, plants that are  
419 pollinated by specific animals will be more adversely affected than plants that are generally  
420 pollinated by several species. Most of current biotically pollinated plants and their pollinating  
421 animals are generalists (Waser et al., 1996), although insect pollinators that feed from and  
422 pollinate a single plant species do exist (Gorelick, 2001; Toon et al., 2020). The angiosperm  
423 extinction rates decreased after the K/Pg boundary in parallel to an increased speciation (Silvestro  
424 et al., 2015), while the contrary is observed with the conifer diversity (Condamine et al., 2020).

425

## 426 **Conclusions**

427 The origin of angiosperms and their coevolution with potential pollinators remains enigmatic, but  
428 significant progresses have been made in the last decade with fossil-based and phylogenetic  
429 studies. Early diversification of angiosperms and their insect pollinators were largely decoupled  
430 (van der Kooi and Ollerton, 2020; Asar et al., 2022). Pollinator insect lineages predated flowers  
431 (Labandeira et al., 2007; Peris et al., 2020; Asar et al., 2022) (Figure 4). We also know that insect  
432 family-richness peaked 125 Ma (Claphman et al., 2016; Schachat et al., 2019) (Figure 2), which  
433 coincides with numerous pollinator lineages that were adapted to pollinate gymnosperms  
434 (Labandeira et al., 2007; Peris et al., 2017; Peris et al., 2020). By contrast, most angiosperm  
435 families (58–80%) originated between ~100 and 90 Ma, during the warmest phases of the  
436 Cretaceous (Ramírez-Barahona et al., 2020). This is also the exact time when first angiosperm  
437 pollinators are found in the fossil record (Peris et al., 2020; Peña-Kairath et al., in prep.).

438 Despite their time of origin, the rise to ecological dominance of modern-day angiosperms  
439 was geographically heterogeneous and took place after a prolonged period, lasting until the  
440 Palaeocene, concomitant with the onset of crown diversification in most families (Crisp and Cook,  
441 2011; Ramírez-Barahona et al., 2020), and pushing different gymnosperm lineages to decline  
442 (Condamine et al. 2020; Mazet et al., 2022). We have found that the flowering plant evolution  
443 promoted a faster diversification of insects, not only driving the origination of insect families but  
444 also buffering them against extinction since the mid-Cretaceous (Table 1, Figures 2–3).

445 Reducing the idea of angiosperm-pollinator co-evolution to a single period under the  
446 analysis of being cause or consequence of each other (e.g., Khramov et al., 2020) may be an

447 excessive simplification. On one hand, there was a significant pool of gymnosperm pollinators  
448 that might have been available for angiosperms since their beginning (Labandeira et al., 2007;  
449 Peris et al., 2017; Peris et al., 2020). On the other hand, we found a link between the diversification  
450 of angiosperms and insects, including the evolution of Late Cretaceous pollinator lineages such  
451 as bees and butterflies (Sann et al., 2018; Chazot et al., 2019). Pollination is a very complex  
452 system of mutualistic relationships that is necessary to be analysed in time, space and morphology  
453 case by case (eg., Lavaut et al., 2022). Focusing on a single driver of increased diversification  
454 seems to be a reductionist approach that will lead to incomplete explanations (O'Meara et al.  
455 2016; Sauquet and Magallón, 2018). More likely, trait–environment combinations may spur  
456 diversification affecting speciation and/or extinction rates (Bouchenak-Khelladi et al., 2015;  
457 Lagomarsino et al., 2016; O'Meara et al., 2016; Freyman and Höhna, 2019).

458

## 459 **Methods**

### 460 *Fossil data and multivariate birth-death analyses*

461 We retrieved the times of origination and times of extinction for 1,527 families of which 671  
462 extant and 856 extinct families, which have been estimated from 38,000+ fossil occurrences at  
463 the family level (Condamine et al., 2016). To examine variations of insect family diversity  
464 through time, we reconstructed the lineages-through-time using PyRate 3 (Silvestro et al., 2019)  
465 and the input file of origination and extinction times of all insect families (*-lft 1* option).

466 PyRate has developed and implemented this birth-death model to test for a correlation  
467 between speciation and extinction rates and changes in environmental variables (Lehtonen et al.,  
468 2017). We used the Multivariate Birth-Death model (MBD) to assess to what extent biotic and  
469 abiotic factors can explain temporal variation in speciation and extinction rates. Under the MBD  
470 model, speciation and extinction rates can change through time, but equally across all lineages,  
471 through correlations with multiple time-continuous variables, and the strengths and signs (positive  
472 or negative) of the correlations are jointly estimated for each variable (Lehtonen et al., 2017). The  
473 MBD model includes temporal fluctuations of environmental variables, so that the speciation and  
474 extinction rates can depend on the variations of each factor. The correlation parameters can take  
475 negative values indicating negative correlation, or positive values for positive correlations. When  
476 their value is estimated to be approximately zero, no correlation is estimated. A Markov chain  
477 Monte Carlo (MCMC) algorithm jointly estimates the baseline speciation ( $\lambda_0$ ) and extinction ( $\mu_0$ )  
478 rates and all correlation parameters ( $G\lambda$  and  $G\mu$ ) using a horseshoe prior to control for over-  
479 parameterization and for the potential effects of multiple testing. The horseshoe prior provides an  
480 efficient approach to distinguishing correlation parameters that should be treated as noise (and  
481 therefore shrunk around 0) from those that are significantly different from 0 and represent true  
482 signal. We ran the MBD model using 50 million MCMC iterations and sampling every 50,000 to  
483 approximate the posterior distribution of all parameters ( $\lambda_0$ ,  $\mu_0$ , ten  $G\lambda$ , ten  $G\mu$ , and the shrinkage

484 weights of each correlation parameter,  $\omega G$ ). We summarized the results of the MBD analyses by  
485 calculating the posterior mean and 95% credibility interval of all correlation parameters and the  
486 mean of the respective shrinkage weights (across ten replicates), as well as the mean and 95%  
487 credibility interval of the baseline speciation and extinction rates.

488         The MBD model assumes that diversification rates vary continuously through time with  
489 a given variable. However, it is possible that rates vary positively during a given time interval and  
490 then negatively in another time interval (Neubauer et al., 2022). In other words, drivers of  
491 diversification can vary over time. We thus tested whether the impact of angiosperm diversity  
492 was similar over time, during the ATR (100-50 Ma, *sensu* Benton et al. 2022) and post-ATR (50-  
493 0 Ma). The MBD analyses were thus performed with time constraints to estimate rates within this  
494 time interval by setting up the *-maxT 100 minT 50* or *-maxT 50 minT 0* option to represent the  
495 ATR timeframe and the post-ATR period, respectively.

496

#### 497 ***Paleoenvironmental variables***

498 To identify putative mechanisms of insect diversification, we examined the correlation between  
499 a series of past environmental variables and origination/extinction rates over their entire history.  
500 We focused on the role of four paleoenvironmental variables, also called proxies, which have  
501 been linked to biodiversity change. These proxies were classified as either abiotic or biotic  
502 controls as follows: (i) *Abiotic controls*. Climate change (variations from warming to cooling  
503 periods) is one of the most probable drivers of diversification changes throughout the history of  
504 life (Erwin, 2009; Condamine et al., 2019). Major trends in global climate change through time  
505 are typically estimated from relative proportions of different oxygen isotopes ( $\delta^{18}\text{O}$ ) in samples  
506 of benthic foraminifer shells. We merged  $\delta^{18}\text{O}$  global temperature data from different sources  
507 (Westerhold et al., 2020 for the Cenozoic; Veizer and Prokoph, 2015 for the rest of the  
508 Phanerozoic) to provide  $\delta^{18}\text{O}$  data spanning the full time-range over which insect families  
509 originated. Second, global continental fragmentation, as approximated by plate tectonic change  
510 over time, has also been proposed as a driver of diversity dynamics (Zaffos et al., 2017). We  
511 retrieved the index of continental fragmentation developed by Zaffos et al. (2017) using  
512 paleogeographic reconstructions for 1-million-year time intervals. This index approaches 1 when  
513 all plates are not connected (complete plate fragmentation) and approaches 0 when there is  
514 maximum aggregation. (ii) *Biotic controls*. Ecological interactions with rapidly expanding clades  
515 are increasingly recognized as important macroevolutionary drivers (Condamine et al., 2020).  
516 Insects experienced drastic floristic changes throughout their evolutionary history with the origin  
517 and rapid radiation of angiosperms at the expense of a decline in diversity of gymnosperms and  
518 ferns. The rise and dominance of angiosperms may have contributed to altering the dietary  
519 regimes of herbivorous insects, which could in turn have affected insects that depend on  
520 herbivores by a cascading effect. We thus compiled the relative diversity trajectories of



521 angiosperms, gymnosperms, and spore plants (mostly composed of ferns) based on previous  
522 estimates of plant diversity (Silvestro et al., 2015). (iii) *Insect diversity*. Biotic interactions within  
523 insects could also have influenced their diversification. For instance, we could draw hypotheses  
524 of diversity dependence such that insects could either impact or be impacted by their own  
525 diversity. In other words, the change in their diversity can affect their diversification as proposed  
526 in diversity-dependent hypotheses. We thus included the paleodiversity of all insect families to  
527 account for diversity dependence within insects as an independent variable.

528

### 529 **Figures**

530 Figures were created using CorelDRAW Graphics Suite software, version 19.0.  
531 ([www.coreldraw.com](http://www.coreldraw.com)). Figure 2 was designed based on the results obtained after the data analysis  
532 with the software R. Figure 4 was designed based on the “Tree of life” from the Museum of  
533 Natural History at the Oxford University, courtesy from Dr. Ricardo Pérez de la Fuente.

534

### 535 **Acknowledgements**

536 DP thanks the Ministry of Economy and Competitiveness of Spain (project “CRE”, Spanish  
537 AEI/FEDER, UE CGL2017-84419) for financial support. This is contribution no. 4 of the  
538 postdoctoral fellowships programme Beatriu de Pinós project 2020 BP 00015, *The flowering*  
539 *plant success – Influence of beetles*, funded to DP by the Secretary of Universities and Research  
540 (Government of Catalonia) and by the Horizon 2020 programme of research and innovation of  
541 the European Union under the Marie-Curie grant agreement no. 801370. FLC is supported by the  
542 European Research Council (ERC) under the European Union's Horizon 2020 research and  
543 innovation programme (project GAIA, agreement no. 851188).

544

### 545 **Competing interests**

546 Authors declare that they have no competing interests.

547

### 548 **Data and materials availability**

549 All data are available in the main text or the supplementary information.

550

### 551 **References**

- 552 1. Ahrens, D., Schwarzer, J., Vogler, A.P. 2014 The evolution of scarab beetles tracks the  
553 sequential rise of angiosperms and mammals. *Proceedings of the Royal Society B:*  
554 *Biological Sciences*, 281, 20141470.
- 555 2. Allio, R., Nabholz, B., Wanke, S., Chomicki, G., Pérez-Escobar, O.A., Cotton, A.M.,  
556 CLamens, A.L., Kergoat, G.J., Sperling, F.A.H., Condamine, F.L. 2021. Genome-wide

- 557 macroevolutionary signatures of key innovations in butterflies colonizing new host  
558 plants. *Nature Communications*, 12, 354.
- 559 3. Asar, Y., Ho, S.Y.W., Sauquet, H. 2022. Early diversifications of angiosperms and their  
560 insect pollinators: were they unlinked? *Trends in Plant Science*, 27, 858–869.
- 561 4. Barba-Montoya, J., dos Reis, M., Schneider, H., Donoghue, P., Yang, Z. 2018.  
562 Constraining uncertainty in the timescale of angiosperm evolution and the veracity of a  
563 Cretaceous Terrestrial Revolution. *New Phytologist*, 218, 819–834.
- 564 5. Bateman, R.M. 2020. Hunting the Snark: the flawed search for mythical Jurassic  
565 angiosperms. *Journal of Experimental Botany*, 71, 22–35.
- 566 6. Benton, M.J., Wilf, P., Sauquet, H. 2022. The Angiosperm Terrestrial Revolution and the  
567 origins of modern biodiversity. *New Phytologist*, 233, 2017–2035.
- 568 7. Bouchenak-Khelladi, Y., Onstein, R.E., Xing, Y., Schwery, O., Linder, H.P. 2015. On  
569 the complexity of triggering evolutionary radiations. *New Phytologist*, 207, 313–26.
- 570 8. Boyce, C.K., Lee, J.E. 2010. An exceptional role for flowering plant physiology in the  
571 expansion of tropical rainforests and biodiversity. *Proceedings of the Royal Society B:*  
572 *Biological Sciences*, 277, 3437–3443.
- 573 9. Bromham, L., Duchêne, S., Hua, X., Ritchie, A.M., Duchêne, D.A., Ho, S.Y. 2018.  
574 Bayesian molecular dating: opening up the black. *Biological Reviews*, 93, 1165–1191.
- 575 10. Budd, G.E., Mann, R.P. 2020. The dynamics of stem and crown groups. *Science*  
576 *Advances*, 6, eaaz1626.
- 577 11. Budd, G.E., Mann, R.P., Doyle, J.A., Coiro, M., Hilton, J. 2021. Fossil data do not support  
578 a long pre-Cretaceous history of flowering plants. *bioRxiv*, 2021.02.16.431478.
- 579 12. Buggs, R.J.A. 2021. The origin of Darwin’s “abominable mystery.” *American Journal of*  
580 *Botany*, 108, 22–36.
- 581 13. Cai, C., Escalona, H.E., Li, L., Yin, Z., Huang, D., Engel, M.S. 2018. Beetle pollination  
582 of cycads in the Mesozoic. *Current Biology*, 28, 2806–2812.
- 583 14. Cai, C., Tihelka, E., Giacomelli, M., Lawrence, J.F., Slipinski, A., Kundrata, R.,  
584 Yamamoto, S., Thayer, M.K., Newton, A.F., Leschen, R.A.B., Gimmel, M.L., Engel,  
585 M.S., Bouchard, P., Huang, D., Pisani, D., Donoghue, P.C.J. 2022. Integrated  
586 phylogenomics and fossil data illuminate the evolution of beetles. *Royal Society Open*  
587 *Science*, 9, 211771.
- 588 15. Christenhusz, M.J.M., Byng, J.W. 2016. The number of known plants species in the world  
589 and its annual increase. *Phytotaxa*, 261, 201–217.
- 590 16. Clapham, M.E., Karr, J.A., Nicholson, D.B., Ross, A.J., Mayhew, P.J. 2016. Ancient  
591 origin of high taxonomic richness among insects. *Proceedings of the Royal Society B:*  
592 *Biological Sciences*, 283, 20152476.

- 593 17. Clarke, J.T., Warnock, R.C.M., Donoghue, P.C.J. 2011. Establishing a time-scale for  
594 plant evolution. *New Phytologist*, 192, 266–301.
- 595 18. Cardinal, S., Danforth, B.N. 2013. Bees diversified in the age of eudicots. *Proceedings of*  
596 *the Royal Society B: Biological Sciences*, 280, 20122686.
- 597 19. Carvalho, M.R., Jaramillo, C., de la Parra, F., Caballero-Rodríguez, D., Herrera, F., Wing,  
598 S., Turner, B., D’Apolito, C., Romera-Báez, M., Narváez, P., Martínez, C., Gutiérrez, M.,  
599 Labandeira, C.C., Bayona, G., Rueda, M., Paez-Reyes, M., Álvaro-Duque, D., Crowley,  
600 J.L., Santos, C., Silvestro, D. 2021. Extinction at the end-Cretaceous and the origin of  
601 modern Neotropical rainforests. *Science*, 372, 63–68.
- 602 20. Citerne, H.L., Jabbour, F., Nadot, S., Damerval, C. 2010. The evolution of floral  
603 symmetry. *Advances in Botanical Research*, 54, 85–137.
- 604 21. Claphman, M.E., Karr, J.A., Nicholson, D.B., Ross, A.J., Mayhew, P.J. 2016. Ancient  
605 origin of high taxonomic richness among insects. *Proceedings of the Royal Society B:*  
606 *Biological Sciences*, 283, 20152476.
- 607 22. Crepet, W.L. 1984. Advanced (constant) insect pollination mechanisms: pattern of  
608 evolution and implications vis-à-vis angiosperm diversity. *Annals of the Missouri*  
609 *Botanical Garden*, 71, 607–630.
- 610 23. Coiro, M., Doyle, J.A., Hilton, J. 2019. How deep is the conflict between molecular and  
611 fossil evidence on the age of angiosperms? *New Phytologist*, 223, 83–99.
- 612 24. Condamine, F.L., Nagalingum, N.S., Marshall, C.R., Morlon, H. 2015. Origin and  
613 diversification of living cycads: a cautionary tale on the impact of the branching process  
614 prior in Bayesian molecular dating. *BMC Evolutionary Biology*, 15, 1–18.
- 615 25. Condamine, F.L., Clapham, M.E., Kergoat, G.J. 2016. Global patterns of insect  
616 diversification: towards a reconciliation of fossil and molecular evidence? *Scientific*  
617 *Reports*, 6, 19208.
- 618 26. Condamine, F.L., Silvestro, D., Koppelhus, E.B., Antonelli, A. 2020. The rise of  
619 angiosperms pushed conifers to decline during global cooling. *Proceedings of the*  
620 *National Academy of Sciences of the United States of America*, 117, 28867–28875.
- 621 27. Crisp, M.D., Cook, L.G. 2011. Cenozoic extinctions account for the low diversity of  
622 extant gymnosperms compared with angiosperms. *New Phytologist*, 192, 997–1009.
- 623 28. Culley, T.M., Weller, S.G., Sakai, A.K. 2002. The evolution of wind pollination in  
624 angiosperms. *Trends in Ecology & Evolution*, 17, 361–369.
- 625 29. Currano, E.D., Laker, R., Flynn, A.G., Fogt, K.K., Stradtman, H., Wing, S.L. 2016.  
626 Consequences of elevated temperature and *p*CO<sub>2</sub> on insect folivory at the ecosystem  
627 level: perspectives from the fossil record. *Ecology and Evolution*, 6, 4318–4331.
- 628 30. Davies, T.J., Barraclough, T.G., Chase, M.W., Soltis, P.S., Soltis, D.E., Savolainen, V.  
629 2004. Darwin’s abominable mystery: insights from a supertree of the angiosperms.

- 630 Proceedings of the National Academy of Sciences of the United States of America, 101,  
631 1904–1909.
- 632 31. Dooreenweerd, C., Van Nieuwerkerken, E.J., Hoare, R.J. 2017. Phylogeny, classification and  
633 divergence times of pygmy leaf-mining moths (Lepidoptera: Nepticulidae): the earliest  
634 lepidopteran radiation on Angiosperms? *Systematic Entomology*, 42, 267–287.
- 635 32. Doyle, J.A. 2012. Molecular and fossil evidence on the origin of angiosperms. *Annual*  
636 *Review of Earth and Planetary Sciences*, 40, 301–326.
- 637 33. Doyle, J.A., Hotton, C.L. 1991. Diversification of early angiosperm pollen in a cladistic  
638 context. In: Blackmore S, Barnes S, (Eds.) *Pollen and spores: patterns of diversification*.  
639 Oxford, UK: Clarendon Press, 169–195.
- 640 34. Erwin, D.H. 2009. Climate as a driver of evolutionary change. *Current Biology*, 19, 575–  
641 583.
- 642 35. Friis, E.M., Pedersen, K.R. 1996. *Eucommiitheca*, a new pollen organ with  
643 *Eucommiidites* pollen from the Early Cretaceous of Portugal. *Grana*, 35, 104–112.
- 644 36. Friis, E.M., Crane, P.R., Pedersen, K.R. 2011. *Early Flowers and Angiosperm Evolution*  
645 Cambridge University Press.
- 646 37. Fu, Q., Diez, J.B., Pole, M., García-Ávila, M., Liu, Z., Chu, H., Hou, Y., Yin, P., Zhang,  
647 G., Du, K., Wang, X. 2018. An unexpected noncarpellate epigynous flower from the  
648 Jurassic of China. *eLife*, 7, 1–24.
- 649 38. Giribet, G., Edgecombe, G.D. 2019. The phylogeny and evolutionary history of  
650 arthropods. *Current Biology*, 29, 592–602.
- 651 39. Grimaldi, D. 1999. The co-radiations of pollinating insects and angiosperms in the  
652 Cretaceous. *Annals of the Missouri Botanical Garden*, 86, 373–406.
- 653 40. Gorelick, R. 2001. Did insect pollination cause increased seed plant diversity? *Biological*  
654 *Journal of the Linnean Society*, 74, 407–427.
- 655 41. Herendeen, P.S., Friis, E.M., Pedersen, K.R., Crane, P.R. 2017. Palaeobotanical redux:  
656 revisiting the age of the angiosperms. *Nature Plants*, 3, 17015.
- 657 42. Hu, S., Dilcher, D.L., Jarzen, D.M., Taylor, D.W. 2008. Early steps of angiosperm–  
658 pollinator coevolution. *Proceedings of the National Academy of Sciences of the United*  
659 *States of America*, 105, 240–245.
- 660 43. Huang, D.-Y., Bechly, G., Nel, P., Engel, M.S., Prokop, J., Azar, D., Cai, C.-Y., van de  
661 Kamp, T., Staniczek, A.H., Garrouste, R., Krogman, L., dos Santos Rolo, T., Baumabach,  
662 T., Ohlhoff, R., Shmakov, A.S., Bourgoin, T. Nel, A. 2016. New fossil insect order  
663 Permopsocida elucidates major radiation and evolution of suction feeding in  
664 hemimetabolous insects (Hexapoda: Acercaria). *Scientific Reports*, 6, 23004.
- 665 44. Hughes, N.F. 1994. *The Enigma of Angiosperm Origins* (Cambridge University Press).

- 666 45. Ickert-Bond, S.M., Renner, S.S. 2016. The Gnetales: recent insights on their morphology,  
667 reproductive biology, chromosome numbers, biogeography, and divergence times.  
668 *Journal of Systematics and Evolution*, 54, 1–16.
- 669 46. Jarzembowski, E.A., Ross, A.J. 1996. Insect origination and extinction in the  
670 Phanerozoic. *Geological Society London Special Publications*, 102, 65–78.
- 671 47. Khramov, A.V. Bashkuev, A.S. and Lukashovich, E.D. 2020. The fossil record of long-  
672 proboscoid nectarivorous insects. *Entomological Review*, 100, 881–968.
- 673 48. Khramov, A.V., Naugolnykh, S.V., Wegierek, P. 2022. Possible long-proboscoid insect  
674 pollinators from the Early Permian of Russia. *Current Biology*, 32, 3815–3820.
- 675 49. Labandeira, C.C. 1998. Early history of arthropod and vascular plant associations. *Annual*  
676 *Review of Earth and Planetary Sciences*, 26, 329–377.
- 677 50. Labandeira, C.C. 2000. The paleobiology of pollination and its precursors, in  
678 *Paleontological Society Papers*, Vol. 6: Phanerozoic Terrestrial Ecosystems, Gastaldo,  
679 R.A. and DiMichele, W.A. (Eds.), 2000, p. 233.
- 680 51. Labandeira, C.C. 2014. Why did terrestrial insect diversity not increase during the  
681 Angiosperm Radiation? Mid-Mesozoic, plant-associated insect lineages harbor clues. In:  
682 *Evolutionary Biology: Genome Evolution, Speciation, Coevolution and Origin of Life*,  
683 Pierre Pontarotti (Ed.). Springer, pp. 261–299.
- 684 52. Labandeira, C.C., Eble, G.J. 2000. The fossil record of insect diversity and disparity. In:  
685 Anderson, J., Thackeray, F., Van Wyk, B. De Wit, M. (Eds.). *Gondwana alive:*  
686 *biodiversity and the evolving biosphere*. pp. 2–54. Witwatersrand Universit Press.
- 687 53. Labandeira CC, Sepkoski Jr JJ. 1993. Insect diversity in the fossil record. *Science*, 261,  
688 310–315.
- 689 54. Labandeira, C.C., Kvaček, J., Mostovski, M.B. 2007. Pollination drops, pollen, and insect  
690 pollination of Mesozoic gymnosperms. *Taxon*, 56, 663–695.
- 691 55. Lavaut, E., Guillemim, M.-L., Colin, S., Faure, A., Coudret, J., Destombe, C., Valero, M.  
692 2022. Pollinators of the sea: A discovery of animal-mediated fertilization in seaweed.  
693 *Science*, 377, 528–530.
- 694 56. Li, H.T., Yi, T.S., Gao, L.M., Ma, P., Zhang, T., Yang, J., Gitzendanner, M.A., Fritsch,  
695 P.W., Cai, J., Luo, Y., Wang, H., van der Bank, M., Zhang, S., Wang, Q., Wang, J.,  
696 Zhang, Z., Fu, C., Yang, J., Hollingsworth, P.M., Chase, M.W., Soltis, D.E., Soltis, P.,  
697 Li, D. 2019. Origin of angiosperms and the puzzle of the Jurassic gap. *Nature Plants*, 5,  
698 461–470.
- 699 57. Lidgard, S., Crane, P.R. 1988. Quantitative analyses of the early angiosperm radiation.  
700 *Nature*, 331, 344–346.

- 701 58. Lloyd, G.T., Davis, K.E., Pisani, D., Tarver, J.E., Ruta, M., Sakamoto, M., Hone, D.W.E.,  
702 Jennings, R., Benton, M.J. 2008. Dinosaurs and the Cretaceous Terrestrial Revolution.  
703 *Proceedings of the Royal Society B: Biological Sciences*, 275, 2483–2490.
- 704 59. Logomarsino, L.P., Condamine, F.L., Antonelli, A. Mulch, A., Davis, C.C. 2016. The  
705 abiotic and biotic drivers of rapid diversification in Andean bellflowers  
706 (*Campanulaceae*). *New Phytologist*, 210, 1430–1442.
- 707 60. Luo, C., Beutel, R.G., Engel, M. S., Liang, K., Li, L., Li, J., Xu, C., Vršanský, P.,  
708 Jarzembowski, E.A., Wang, B. 2021. Life history and evolution of the enigmatic  
709 Cretaceous-Eocene Alienopteridae: A critical review. *Earth-Science Reviews*, 225,  
710 103914.
- 711 61. Magallon S, Castillo A. 2009. Angiosperm diversification through time. *American*  
712 *Journal of Botany* 96, 349–65.
- 713 62. Magallón S, Hilu KW, Quandt D. 2013. Land plant evolutionary timeline: Gene effects  
714 are secondary to fossil constraints in relaxed clock estimation of age and substitution  
715 rates. *American Journal of Botany*, 100, 556–573.
- 716 63. Magallón, S., Gómez-Acevedo, S. Sánchez-Reyes, L.L., Hernández-Hernández, T. 2015.  
717 A metacalibrated time-tree documents the early rise of flowering plant phylogenetic  
718 diversity. *New Phytologist*, 207, 437–453.
- 719 64. Mayhew, P.J., Jenkins, G.B., Benton, T.G. 2008. A long-term association between global  
720 temperature and biodiversity, origination and extinction in the fossil record. *Proceedings*  
721 *of the Royal Society B: Biological Sciences*, 275, 47–53.
- 722 65. Mazet, N., Morlon, H., Fabre, P.-H., Condamine, F.L. 2022. Estimating clade-specific  
723 diversification rates and palaeodiversity dynamics from reconstructed phylogenies.  
724 bioRxiv preprint doi: <https://doi.org/10.1101/2022.05.10.490920>
- 725 66. McKenna, D.D. Sequeira, A.S. Marvaldi, A.E., Farrell B.D. 2009. Temporal lags and  
726 overlap in the diversification of weevils and flowering plants. *Proceedings of the National*  
727 *Academy of Sciences of the United States of America*, 106, 7083–7088.
- 728 67. Misof, B., Liu, S., Meusemann, K., Peters, R. S., Donath, A., Mayer, C., (et al.) & Zhou,  
729 X. (2014). Phylogenomics resolves the timing and pattern of insect evolution. *Science*,  
730 346, 763–767.
- 731 68. Nel, A., Fleck, G., Garcia, G., Gomez, B., Ferchaud, P., Valentin, X. 2015. New  
732 dragonflies from the lower Cenomanian of France enlighten the timing of the odonatan  
733 turnover at the Early-Late Cretaceous boundary. *Cretaceous Research*, 52, 108–117.
- 734 69. Nepi, M., Little, S.A., Guarnieri, M., Nocentini, D., Prior, N.A., Gill, J., Tomlinson, P.B.,  
735 Ickert-Bond, S.M., Pirone, C., Pacini, E. and von Aderkas, P. 2017. Phylogenetic and  
736 functional signals in gymnosperm ovular secretions. *Annals of Botany*, 120, 923–936.

- 737 70. Neubauer, T. A., Hauffe, T., Silvestro, D., Scotese, C. R., Stelbrink, B., Albrecht, C.,  
738 Delicado, D., Harzhauser, M., Wilke, T. 2022. Drivers of diversification in freshwater  
739 gastropods vary over deep time. *Proceedings of the Royal Society B: Biological Sciences*,  
740 289, 20212057.
- 741 71. Nicholson, D.B., Mayhew, P.J., Ross, A. J. 2015. Changes to the fossil record of insects  
742 through fifteen years of discovery. *PLoS One*, 10, e0128554.
- 743 72. Nie, Y., Foster, C.S.P., Zhu, T., Yao, R., Duchêne, D.A., Ho, S.Y.W., Zhong, B. 2020.  
744 Accounting for uncertainty in the evolutionary timescale of green plants through clock-  
745 partitioning and fossil calibration strategies. *Systematic Biology*, 69, 1–16.
- 746 73. Novikoff A., Barabasz-Krasny B. 2015. *Modern plant systematics. General issues.*  
747 Liga-Press, Lviv. – 686 p. (in Ukrainian).
- 748 74. Ollerton, J. 2017. Pollinator diversity: distribution, ecological function, and conservation.  
749 *Annual Review of Ecology, Evolution, and Systematics*, 48, 353–376.
- 750 75. Ollerton, J., Winfree, R., Tarrant, S. 2011. How many flowering plants are pollinated by  
751 animals? *Oikos*, 120, 321–326.
- 752 76. O'Meara, B.C., Smith, S.D., Armbruster, W.S., Harder, L.D., Hardy, C.R., Hileman, L.C.,  
753 Hufford, L., Litt, A., Magallón, S., Smith, S.A., Stevens, P.F., Fenster, C.B. and Diggle,  
754 P.K. 2016. Non-equilibrium dynamics and floral trait interactions shape extant  
755 angiosperm diversity. *Proceedings of the Royal Society B: Biological Sciences*, 283,  
756 20152304.
- 757 77. Onstein, R.E. 2020. Darwin's second 'abominable mystery': trait flexibility as the  
758 innovation leading to angiosperm diversity. *New Phytologist*, 228, 1741–1747.
- 759 78. Peris, D., Davis, R.S., Engel, M.S., Delclòs, X. 2014. An evolutionary history embedded  
760 in amber: reflection of the Mesozoic shift in weevil-dominated (Coleoptera:  
761 Curculionoidea) faunas. *Zoological Journal of the Linnean Society*, 171, 534–553.
- 762 79. Peris, D., Pérez-de la Fuente, R., Peñalver, E., Delclòs, X., Barrón, E., Labandeira, C.C.  
763 2017. False blister beetles and the expansion of gymnosperm-insect pollination modes  
764 before angiosperm dominance. *Current Biology*, 27, 897–904.
- 765 80. Peris, D., Labandeira, C.C., Barrón, E., Delclòs, X., Rust, J., Wang, B. 2020. Generalist  
766 pollen-feeding beetles during the mid-Cretaceous. *iScience*, 23, 100913.
- 767 81. Rainford, J.L., Hofreiter, M., Nicholson, D.B., Mayhew, P.J. 2014. Phylogenetic  
768 distribution of extant richness suggests metamorphosis is a key innovation driving  
769 diversification in insects. *PLoS One*, 9, e109085.
- 770 82. Ramírez-Barahona, S., Sauquet, H., Magallón, S. 2020. The delayed and geographically  
771 heterogeneous diversification of flowering plant families. *Nature Ecology & Evolution*,  
772 4, 1232–1238.

- 773 83. Roddy, A.B., Th eroux-Rancourt, G., Abbo, T., Benedetti, J.W., Brodersen, C.R., Castro,  
774 M., Castro, S., Gilbride, A.B., Jensen, B., Jiang, G.-F., Perkins, J.A., Perkins, S.D.,  
775 Loureiro, J., Syed, Z., Thompson, R.A., Kuebbing, S.E., Simonin, K.A. 2020. The scaling  
776 of genome size and cell size limits maximum rates of photosynthesis with implications  
777 for ecological strategies. *International Journal of Plant Sciences*, 181, 75–87.
- 778 84. Rothwell, G.W., Crepet, W.L., Stockey, R.A. 2009. Is the anthophyte hypothesis alive  
779 and well? New evidence from the reproductive structures of Bennettitales. *American*  
780 *Journal of Botany*, 96, 296–322.
- 781 85. Sann, M., Niehuis, O., Peters, R., Mayer, C., Kozlov, A., Podsiadlowski, L., Bank, S.,  
782 Meusemann, K., Misof, B., Bleidorn, C., Ohl, M. 2018. Phylogenomic analysis of  
783 Apoidea sheds new light on the sister group of bees. *BMC Evolutionary Biology*, 18, 1–  
784 15.
- 785 86. Sauquet, H., Von Balthazar, M., Magall n, S., Doyle, J.A., Endress, P.K., Bailes, E.J., et  
786 al., Sch onenberger, J. 2017. The ancestral flower of angiosperms and its early  
787 diversification. *Nature communications*, 8, 16047.
- 788 87. Sauquet, H., Magall n, S. 2018. Key questions and challenges in angiosperm  
789 macroevolution. *New Phytologist*, 219, 1170–1187.
- 790 88. Sauquet, H., Ram rez-Barahona, S., Magall n, S. 2022. What is the age of flowering  
791 plants? *Journal of Experimental Botany*, erac130.
- 792 89. Schachat, S.R., Labandeira, C.L., Clapham, M.E., Payne, J.L. 2019. A Cretaceous peak  
793 in family-level insect diversity estimated with mark–recapture methodology. *Proceedings*  
794 *of the Royal Society B: Biological Sciences*, 286, 20192054.
- 795 90. Silvestro, D., Bacon, C.D., Ding, W., Zhang, Q., Donoghue, P.C.J., Antonelli, A., Xing,  
796 Y. 2021. Fossil data support a pre-Cretaceous origin of flowering plants. *Nature Ecology*  
797 *and Evolution*, 5, 449–457.
- 798 91. Silvestro, D., Cascales-Mi ana, B., Bacon, C.D., Antonelli, A. 2015. Revisiting the origin  
799 and diversification of vascular plants through a comprehensive Bayesian analysis of the  
800 fossil record. *New Phytologist*, 207, 425–436.
- 801 92. Silvestro, D., Salamin, N., Antonelli, A., Meyer, X. 2019. Improved estimation of  
802 macroevolutionary rates from fossil data using a Bayesian framework. *Paleobiology*, 45,  
803 546–570.
- 804 93. Simonin, K.A., Roddy, A.B. 2018. Genome downsizing, physiological novelty, and the  
805 global dominance of flowering plants. *PLoS Biology*, 16, e2003706.
- 806 94. Simpson, B.B., Neff, J.L. 1981. Floral rewards: Alternatives to pollen and nectar. *Annals*  
807 *of the Missouri Botanical Garden*, 68, 301–322.



- 808 95. Sokoloff, D.D., Remizowa, M.V., El, E.S., Rudall, P.J., Bateman, R.M. 2020. Supposed  
809 Jurassic angiosperms lack pentamery, an important angiosperm-specific feature. *New*  
810 *Phytologist*, 228, 420–426.
- 811 96. Soltis, P.S., Folk, R.A., Soltis, D.E. 2019. Darwin review: angiosperms phylogeny and  
812 evolutionary radiations. *Proceedings of the Royal Society B: Biological Sciences*, 286,  
813 20190099.
- 814 97. Song, H., Béthoux, O., Shin, S., Donath, A., Letsch, H., Liu, S., McKenna, D.D., Mang,  
815 G., Misof, B., Podsiadlowski, L., Zhou, X., Wipfler, B., Simon, S. 2020. Phylogenomic  
816 analysis sheds light on the evolutionary pathways towards acoustic communication in  
817 Orthoptera. *Nature Communications*, 11, 4939.
- 818 98. Suchan, T., Alvarez, N. 2015. Fifty years after Ehrlich and Raven, is there support for  
819 plant–insect coevolution as a major driver of species diversification? *Society*  
820 *Entomologia Experimentalis et Applicata*, 157, 98–112.
- 821 99. Toon, A., Terry, L.I., Tang, W., Walter, G.H., Cook, L.G. 2020. Insect pollination of  
822 cycads. *Austral Ecology*, 43, 1033–1058.
- 823 100. Vamosi, J.C., Magallón, S., Mayrose, I., Otto, S.P., Sauquet, H. 2018.  
824 Macroevolutionary patterns of flowering plant speciation and extinction. *Annual Review*  
825 *of Plant Biology*, 69, 1–22.
- 826 101. Vamosi, J.C., Vamosi, S.M. 2011. Factors influencing diversification in  
827 angiosperms: at the crossroads of intrinsic and extrinsic traits. *American Journal of*  
828 *Botany*, 98, 460–471.
- 829 102. Van del Kooi, C., Ollerton, J. 2020. The origins of flowering plants and  
830 pollinators. *Science*, 368, 1306–1308.
- 831 103. Van der Niet, T., Peakall, R., Johnson, S.D. 2014. Pollinator-driven ecological  
832 speciation in plants: new evidence and future perspectives. *Annals of Botany*, 113, 199–  
833 211.
- 834 104. Veizer, J., Prokoph, A. 2015. Temperatures and oxygen isotopic composition of  
835 Phanerozoic oceans. *Earth-Science Reviews*, 146, 92–104.
- 836 105. Wardhaugh, C.W. 2015. How many species of arthropods visit  
837 flowers? *Arthropod-Plant Interactions*, 9, 547–565.
- 838 106. Waser, N.M., Chittka, L., Price, M.V., Williams, N.M., Ollerton, J. 1996.  
839 Generalization in pollination systems, and why it matters. *Ecology*, 77, 1043–1060.
- 840 107. Westerhold, T., Marwan, N., Drury, A. J., Liebrand, D., Agnini, C., Anagnostou,  
841 E., Barnet, J.K., Bohaty, S.M., de Vleeschouwer, D., Florindo, F., Frederichs, T., Hodell,  
842 D.A., Holbourn, A.E., Kroon, D., Lauretano, V., Litter, K., Lourens, L.J., Lyle, M.,  
843 Pälke, H., Röhl, U., Tian, J., Wilkens, R., Wilson, P.A., Zachos, J.C. (2020). An

844 astronomically dated record of Earth's climate and its predictability over the last 66  
845 million years. *Science*, 369, 1383–1387.

846 108. Wiegmann, B.M., Trautwein, M.D., Winkler, I.S., Barr, N.B., Kim, J.-W.,  
847 Lambkin, C., Bertone, M.A., Cassel, B.K., Bayless, K.M., Heimberg, A.M., Wheeler,  
848 B.M., Peterson, K.J., Pape, T., Sinclair, B.J., Skevington, J.H., Blagoderov, V., Caravas,  
849 J., Kutty, S.N., Schmidt-Ott, U., Kampmeier, G.E., Thompson, F.C., Grimaldi, D.A.,  
850 Beckenbach, A.T., Courtney, G.W., Friedrich, M., Meier, R., Yeates, D.K. 2011.  
851 Episodic radiations in the fly tree of life. *Proceedings of the National Academy of*  
852 *Sciences of the United States of America*, 108, 5690–5695.

853 **Table 1.** Results of the multivariate birth-death model applied to insects in three set of analyses. The table reports the mean and median posterior parameter estimates (and 95% credibility  
854 interval, CI) for the parameters of the MBD model: baseline speciation ( $\lambda_0$ ), extinction rates ( $\mu_0$ ) and correlation parameters ( $G\lambda$  and  $G\mu$ ) for each of the environmental drivers. Shrinkage  
855 weights ( $\omega$ ) greater than 0.5 (highlighted in bold) indicating significant evidence for correlation (positive or negative depending on the respective  $G\lambda$  or  $G\mu$  value).  
856

| Parameters                            | a) Global insect diversification |                |                           | b) Diversification during the ATR (100 to 50 Ma) |                |                           | c) Diversification after the ATR (50 Ma to present) |                |                           |
|---------------------------------------|----------------------------------|----------------|---------------------------|--------------------------------------------------|----------------|---------------------------|-----------------------------------------------------|----------------|---------------------------|
|                                       | Mean                             | Median         | 95% CI                    | Mean                                             | Median         | 95% CI                    | Mean                                                | Median         | 95% CI                    |
| Baseline origination rate $\lambda_0$ | 0.4907                           | 0.3092         | [0.1419, 1.196]           | 0.8383                                           | 0.3012         | [0.0754, 3.278]           | 0.4248                                              | 0.1669         | [0.0206, 1.0825]          |
| Baseline extinction rate $\mu_0$      | 4.8284E-3                        | 4.5032E-3      | [1.9721E-3, 8.4722E-3]    | 7.542E-3                                         | 6.6918E-3      | [2.2163E-3, 0.0149]       | 4.7067E-3                                           | 4.4166E-3      | [1.9018E-3, 7.9883E-3]    |
| G $\lambda$ Insect diversity          | <b>-5.0235</b>                   | <b>-4.9936</b> | <b>[-5.9243, -4.1341]</b> | <b>-3.0585</b>                                   | <b>-3.0844</b> | <b>[-5.1351, -0.8334]</b> | <b>-4.6166</b>                                      | <b>-4.6026</b> | <b>[-5.9835, -2.983]</b>  |
| G $\lambda$ Angiosperms               | <b>0.8165</b>                    | <b>0.8283</b>  | <b>[0.1442, 1.4328]</b>   | -0.3412                                          | -0.2878        | [-1.3542, 0.5499]         | <b>1.0401</b>                                       | <b>1.0524</b>  | <b>[0.1234, 1.9712]</b>   |
| G $\lambda$ Continental frag.         | 2.1159                           | 2.1251         | [0.7511, 3.453]           | -1.3638                                          | -1.216         | [-5.057, 2.2001]          | 1.695                                               | 1.7441         | [-0.1398, 3.392]          |
| G $\lambda$ Gymnosperms               | 0.7459                           | 0.7819         | [-0.0773, 1.5622]         | -0.3112                                          | -0.2339        | [-1.29, 0.4962]           | 1.0731                                              | 1.1089         | [-0.0532, 2.3286]         |
| G $\lambda$ Spore plants              | <b>3.6681</b>                    | <b>3.6892</b>  | <b>[2.9137, 4.3556]</b>   | <b>4.0704</b>                                    | <b>4.108</b>   | <b>[3.0406, 4.9928]</b>   | <b>3.8781</b>                                       | <b>3.8383</b>  | <b>[3.0373, 4.7885]</b>   |
| G $\lambda$ Temperature               | <b>-0.0822</b>                   | <b>-0.0807</b> | <b>[-0.1097, -0.0564]</b> | <b>-0.0935</b>                                   | <b>-0.0925</b> | <b>[-0.1368, -0.0469]</b> | <b>-0.0683</b>                                      | <b>-0.0643</b> | <b>[-0.1125, -0.0159]</b> |
| G $\mu$ Insect diversity              | 0.1455                           | 0.0932         | [-0.524, 0.9017]          | -1.4949                                          | -1.5064        | [-3.1339, 0.2498]         | 0.164                                               | 0.1091         | [-0.5198, 0.9159]         |
| G $\mu$ Angiosperms                   | <b>-1.8155</b>                   | <b>-1.7999</b> | <b>[-2.4776, -1.1818]</b> | <b>-4.5855</b>                                   | <b>-4.5552</b> | <b>[-6.4712, -2.7859]</b> | <b>-1.8073</b>                                      | <b>-1.7907</b> | <b>[-2.4664, -1.1584]</b> |
| G $\mu$ Continental frag.             | 0.4273                           | 0.3555         | [-0.8756, 2.0666]         | <b>7.4912</b>                                    | <b>7.486</b>   | <b>[2.1141, 12.8511]</b>  | 0.4049                                              | 0.313          | [-0.8913, 2.0322]         |
| G $\mu$ Gymnosperms                   | -0.1271                          | -0.0763        | [-0.805, 0.5246]          | -0.1786                                          | -0.1251        | [-0.9781, 0.4926]         | -0.117                                              | -0.0729        | [-0.8323, 0.4772]         |
| G $\mu$ Spore plants                  | <b>2.887</b>                     | <b>2.8952</b>  | <b>[2.1342, 3.6284]</b>   | <b>1.9783</b>                                    | <b>1.9942</b>  | <b>[0.9419, 2.9952]</b>   | <b>2.9128</b>                                       | <b>2.921</b>   | <b>[2.2031, 3.6651]</b>   |
| G $\mu$ Temperature                   | <b>0.0335</b>                    | <b>0.0337</b>  | <b>[0.0179, 0.0489]</b>   | <b>0.0315</b>                                    | <b>0.0318</b>  | <b>[0.0144, 0.049]</b>    | <b>0.0338</b>                                       | <b>0.0339</b>  | <b>[0.0183, 0.0487]</b>   |
| $\omega$ $\lambda$ Insect diversity   | <b>0.9381</b>                    | <b>0.9551</b>  | <b>[0.8172, 1]</b>        | <b>0.8511</b>                                    | <b>0.9029</b>  | <b>[0.5166, 1]</b>        | <b>0.9248</b>                                       | <b>0.9472</b>  | <b>[0.773, 1]</b>         |
| $\omega$ $\lambda$ Angiosperms        | <b>0.5585</b>                    | <b>0.5763</b>  | <b>[0.0881, 0.9999]</b>   | 0.4305                                           | 0.392          | [2.9613E-8, 0.9566]       | <b>0.6025</b>                                       | <b>0.6449</b>  | <b>[0.0957, 0.9997]</b>   |
| $\omega$ $\lambda$ Continental frag.  | 0.4579                           | 0.4197         | [0.0435, 0.9816]          | 0.4203                                           | 0.3781         | [1.0981E-7, 0.9498]       | 0.4007                                              | 0.3402         | [3.0291E-7, 0.9413]       |

|                       |               |               |                         |               |               |                         |               |               |                         |
|-----------------------|---------------|---------------|-------------------------|---------------|---------------|-------------------------|---------------|---------------|-------------------------|
| ω λ Gymnosperms       | 0.4432        | 0.405         | [2.4415E-7, 0.9547]     | 0.3536        | 0.2545        | [2.7701E-8, 0.941]      | 0.4942        | 0.507         | [1.1021E-8, 0.9625]     |
| ω λ Spore plants      | <b>0.861</b>  | <b>0.8913</b> | <b>[0.6245, 1]</b>      | <b>0.8851</b> | <b>0.9139</b> | <b>[0.6791, 1]</b>      | <b>0.8712</b> | <b>0.9</b>    | <b>[0.6482, 1]</b>      |
| ω λ Temperature       | <b>0.8783</b> | <b>0.9098</b> | <b>[0.6531, 1]</b>      | <b>0.8978</b> | <b>0.9309</b> | <b>[0.6817, 1]</b>      | <b>0.801</b>  | <b>0.8729</b> | <b>[0.315, 1]</b>       |
| ω μ Insect diversity  | 0.3319        | 0.2344        | [3.4958E-9, 0.9201]     | 0.6806        | 0.7705        | [0.0725, 1]             | 0.3418        | 0.2428        | [1.183E-7, 0.9353]      |
| ω μ Angiosperms       | <b>0.7614</b> | <b>0.8017</b> | <b>[0.4099, 0.9999]</b> | <b>0.9264</b> | <b>0.9502</b> | <b>[0.7781, 1]</b>      | <b>0.7592</b> | <b>0.7968</b> | <b>[0.4084, 1]</b>      |
| ω μ Continental frag. | 0.2669        | 0.136         | [1.7915E-8, 0.8964]     | <b>0.7439</b> | <b>0.8034</b> | <b>[0.2966, 1]</b>      | 0.2667        | 0.1316        | [7.8828E-12, 0.8947]    |
| ω μ Gymnosperms       | 0.2797        | 0.1553        | [3.1608E-8, 0.9049]     | 0.3161        | 0.1968        | [2.8001E-10, 0.9324]    | 0.2744        | 0.1524        | [5.2828E-8, 0.8987]     |
| ω μ Spore plants      | <b>0.8145</b> | <b>0.851</b>  | <b>[0.5176, 1]</b>      | <b>0.7404</b> | <b>0.7845</b> | <b>[0.348, 1]</b>       | <b>0.8195</b> | <b>0.8563</b> | <b>[0.5299, 1]</b>      |
| ω μ Temperature       | <b>0.6892</b> | <b>0.7259</b> | <b>[0.2751, 1]</b>      | <b>0.6926</b> | <b>0.7342</b> | <b>[0.2646, 0.9998]</b> | <b>0.6846</b> | <b>0.7215</b> | <b>[0.2798, 0.9998]</b> |

857

858 **The following Supporting Information is available for this article:**

859 Supplementary Information – Origination of the insect pollinator lineages
